# Supplementary material for: OxymaPure/DIC: An Efficient Reagent for the Synthesis of a Novel Series of 4-[2-(2-Acetylaminophenyl)-2-oxo-acetylamino] Benzoyl Amino Acid Ester Derivatives
Source: PubMed Central journal article supplement (PMC6269765; doi:10.3390/molecules181214747), 2013-11-28

# Supplementary Materials

Figure S1. <sup>1</sup>H-NMR and <sup>13</sup>C-NMR of Compound 3.

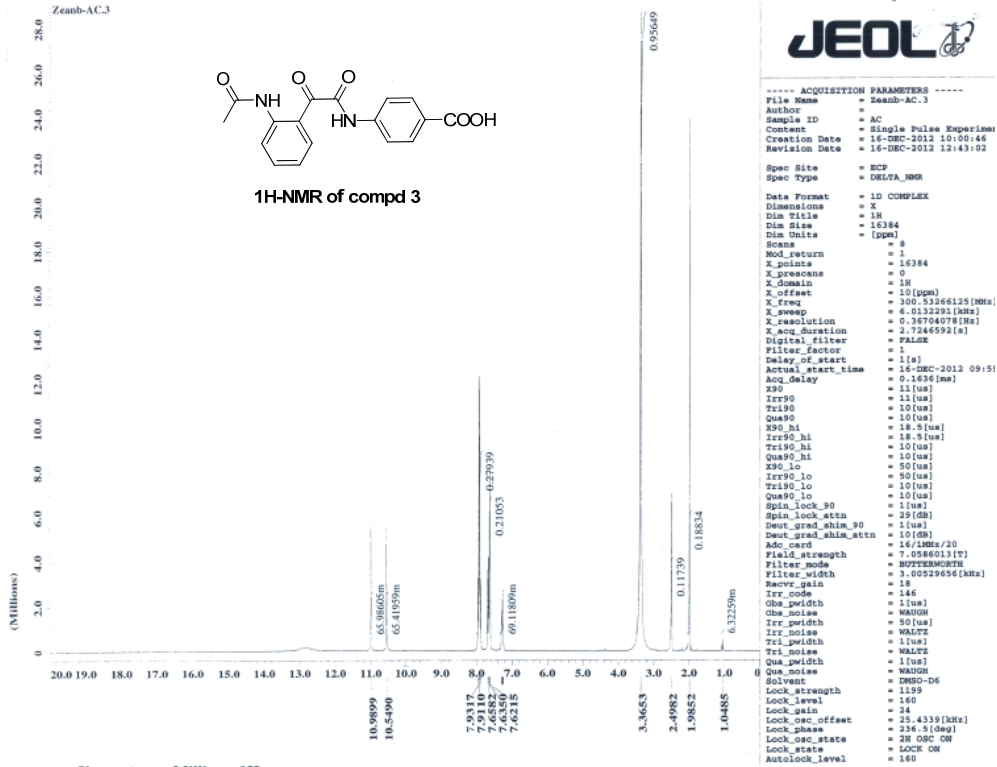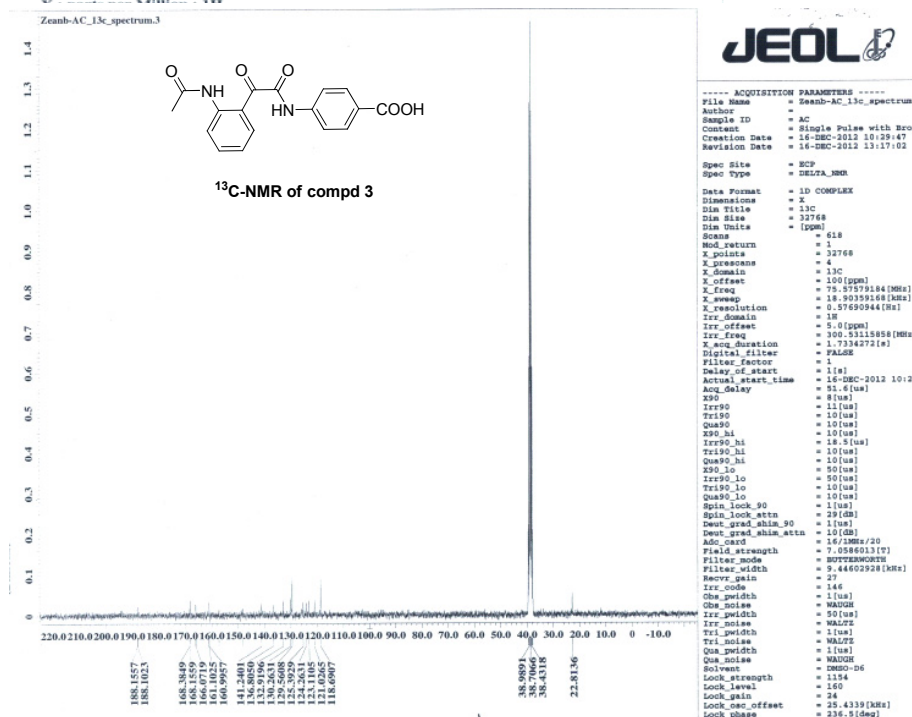

Figure S2. <sup>1</sup>H-NMR and <sup>13</sup>C-NMR of Compound 4a.

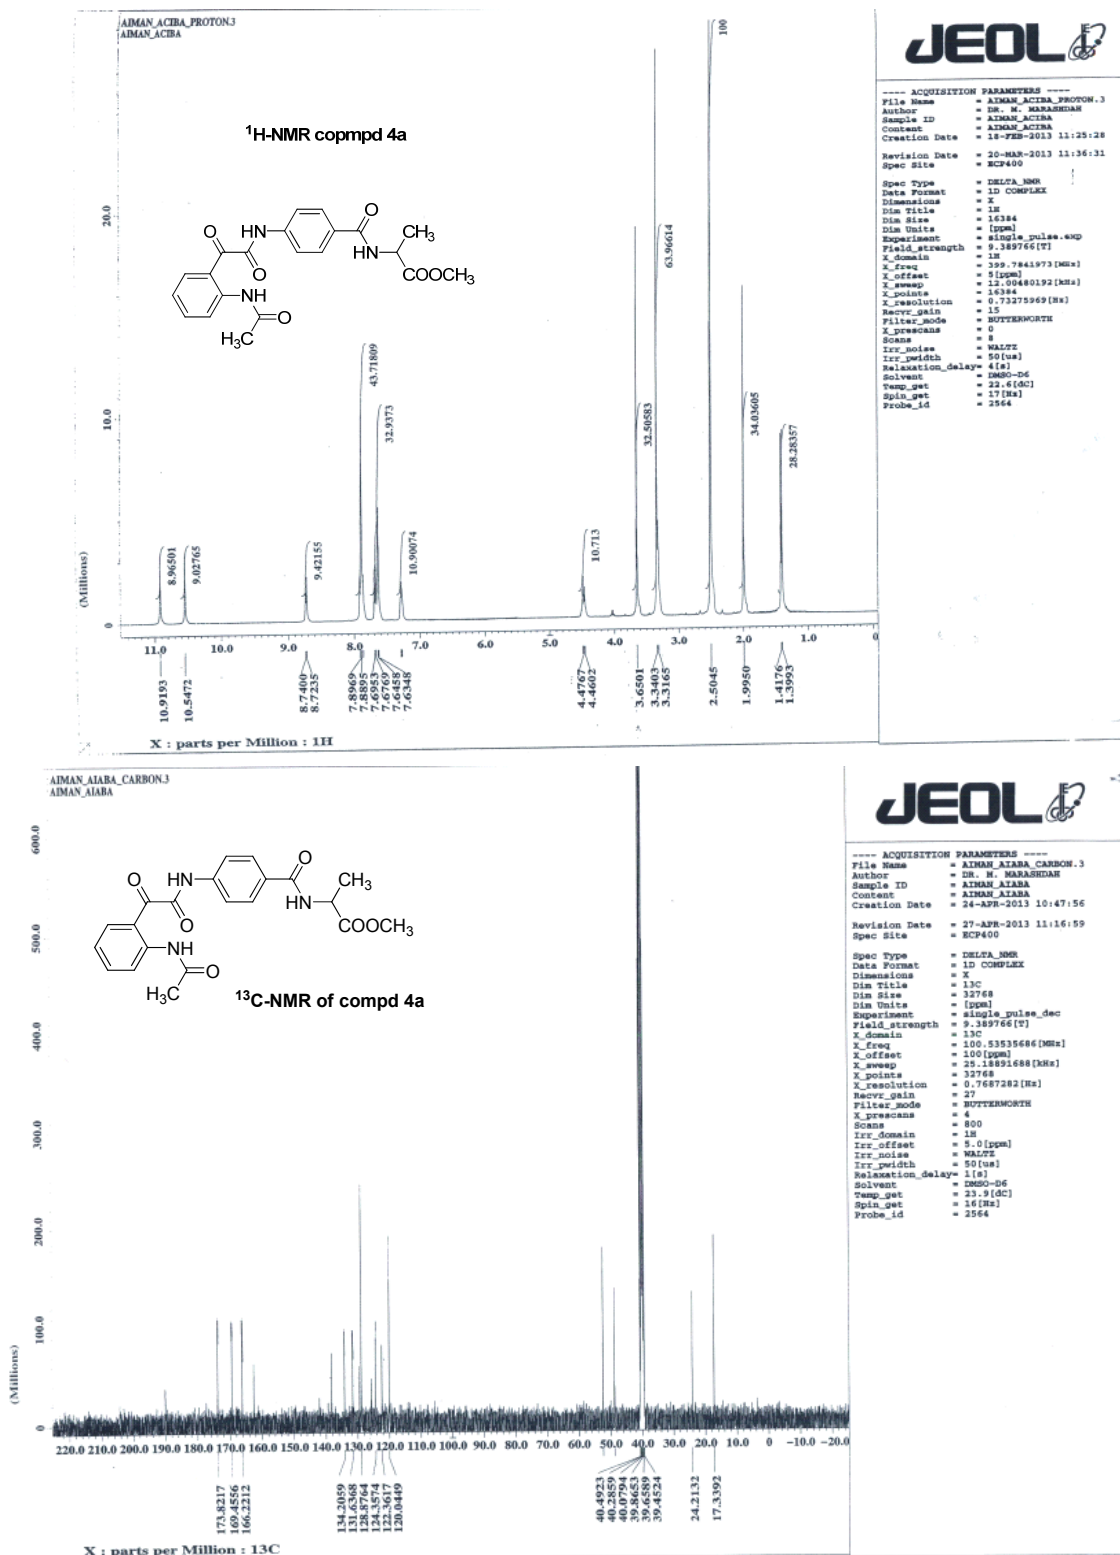

Figure S3. <sup>1</sup>H-NMR and <sup>13</sup>C-NMR of Compound 4b.

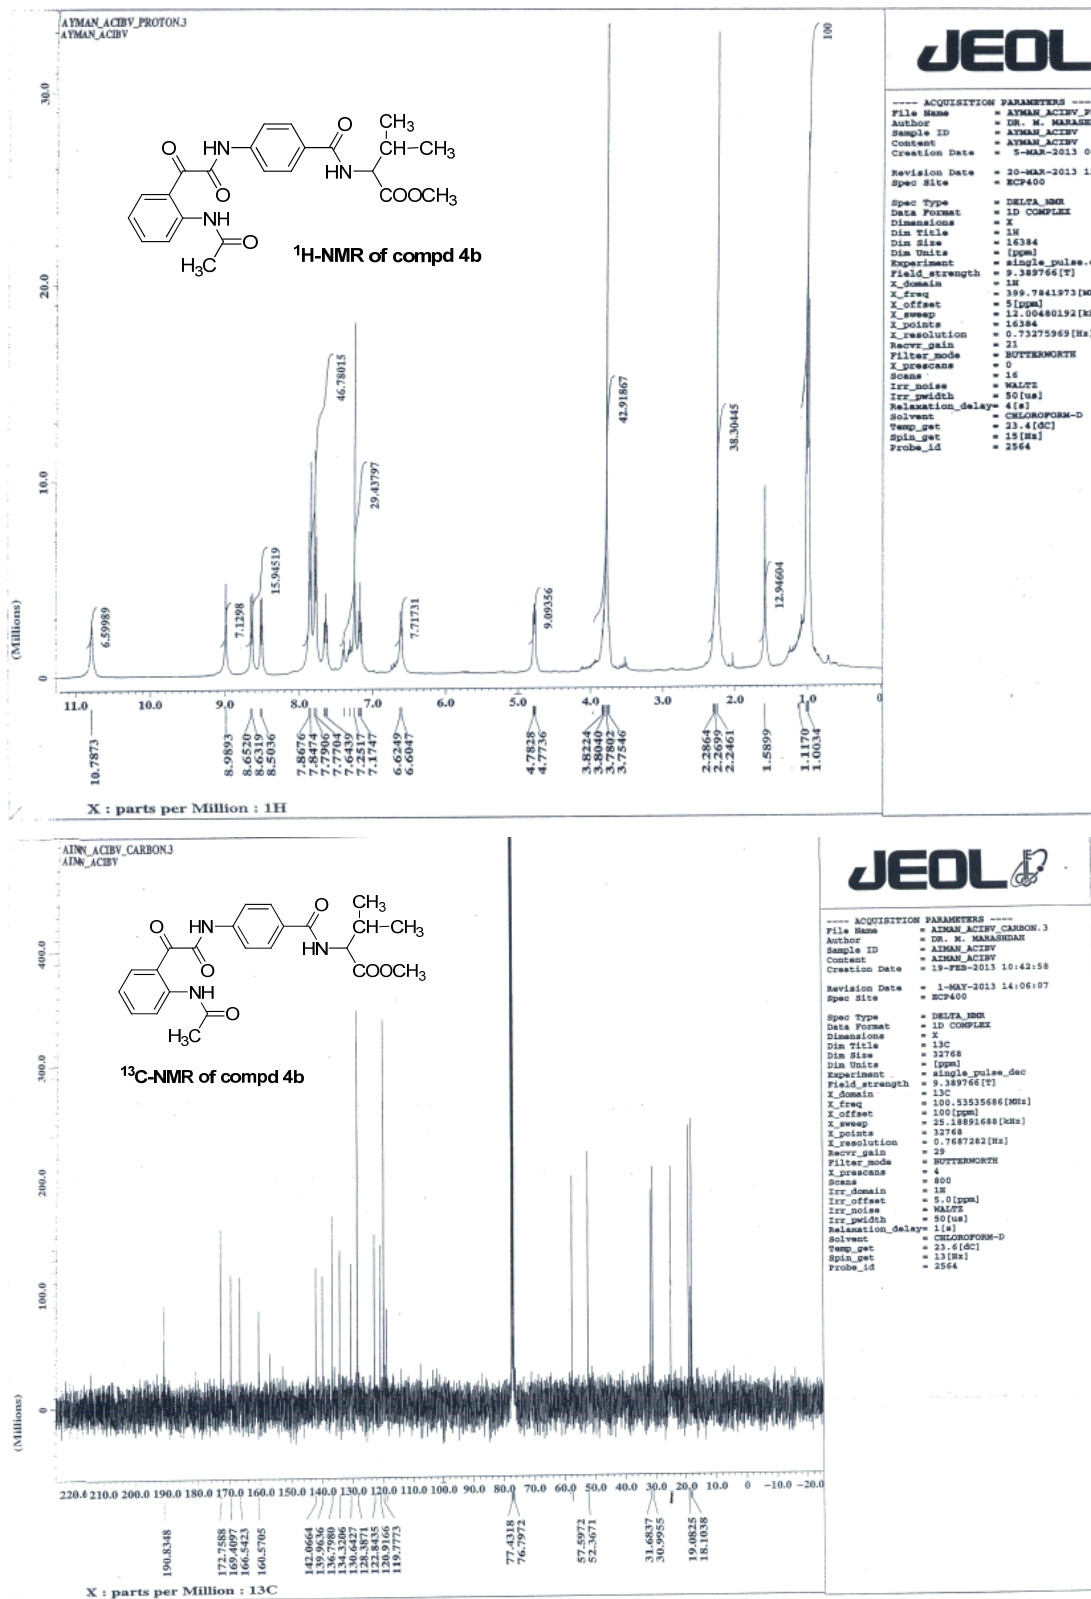

Figure S4. <sup>1</sup>H-NMR and <sup>13</sup>C-NMR of Compound 4c.

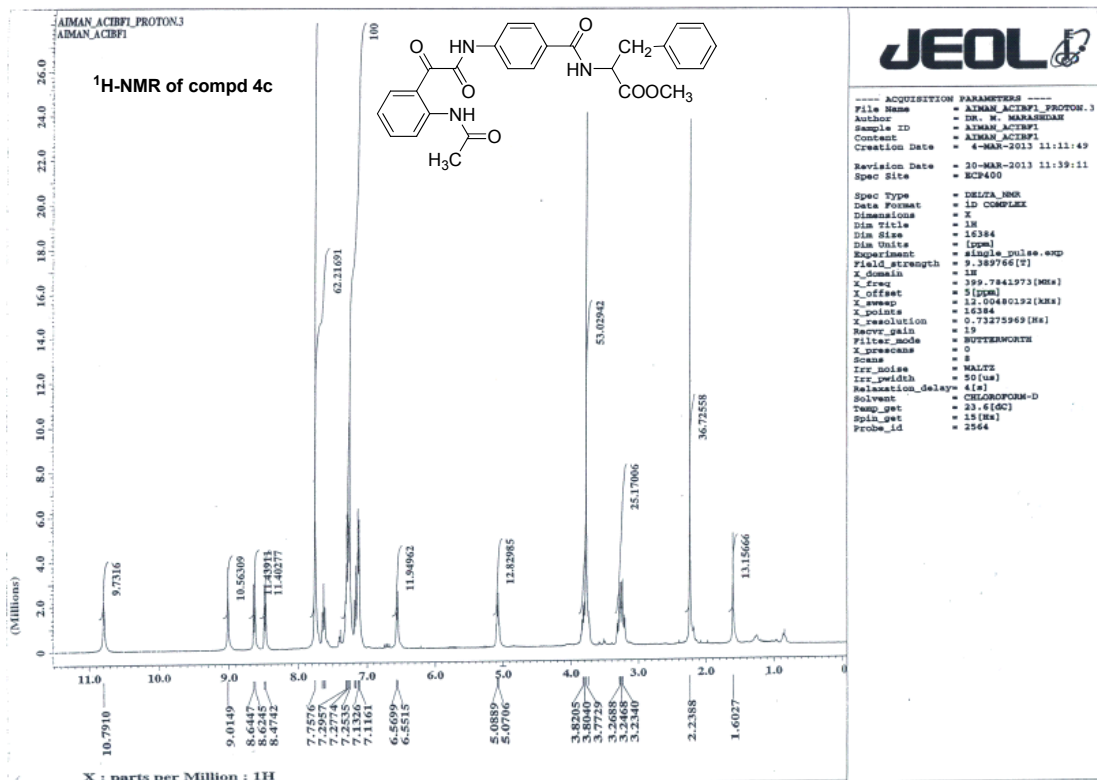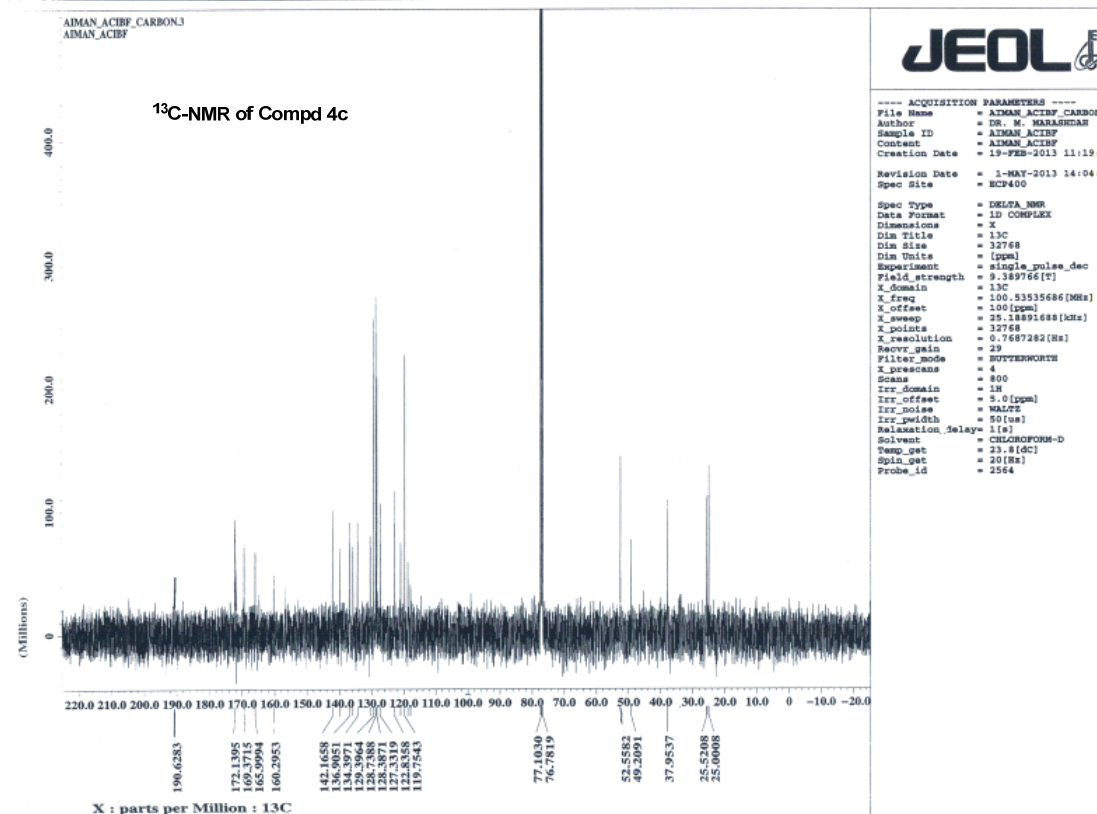

Figure S5. <sup>1</sup>H-NMR and <sup>13</sup>C-NMR of Compound 4d.

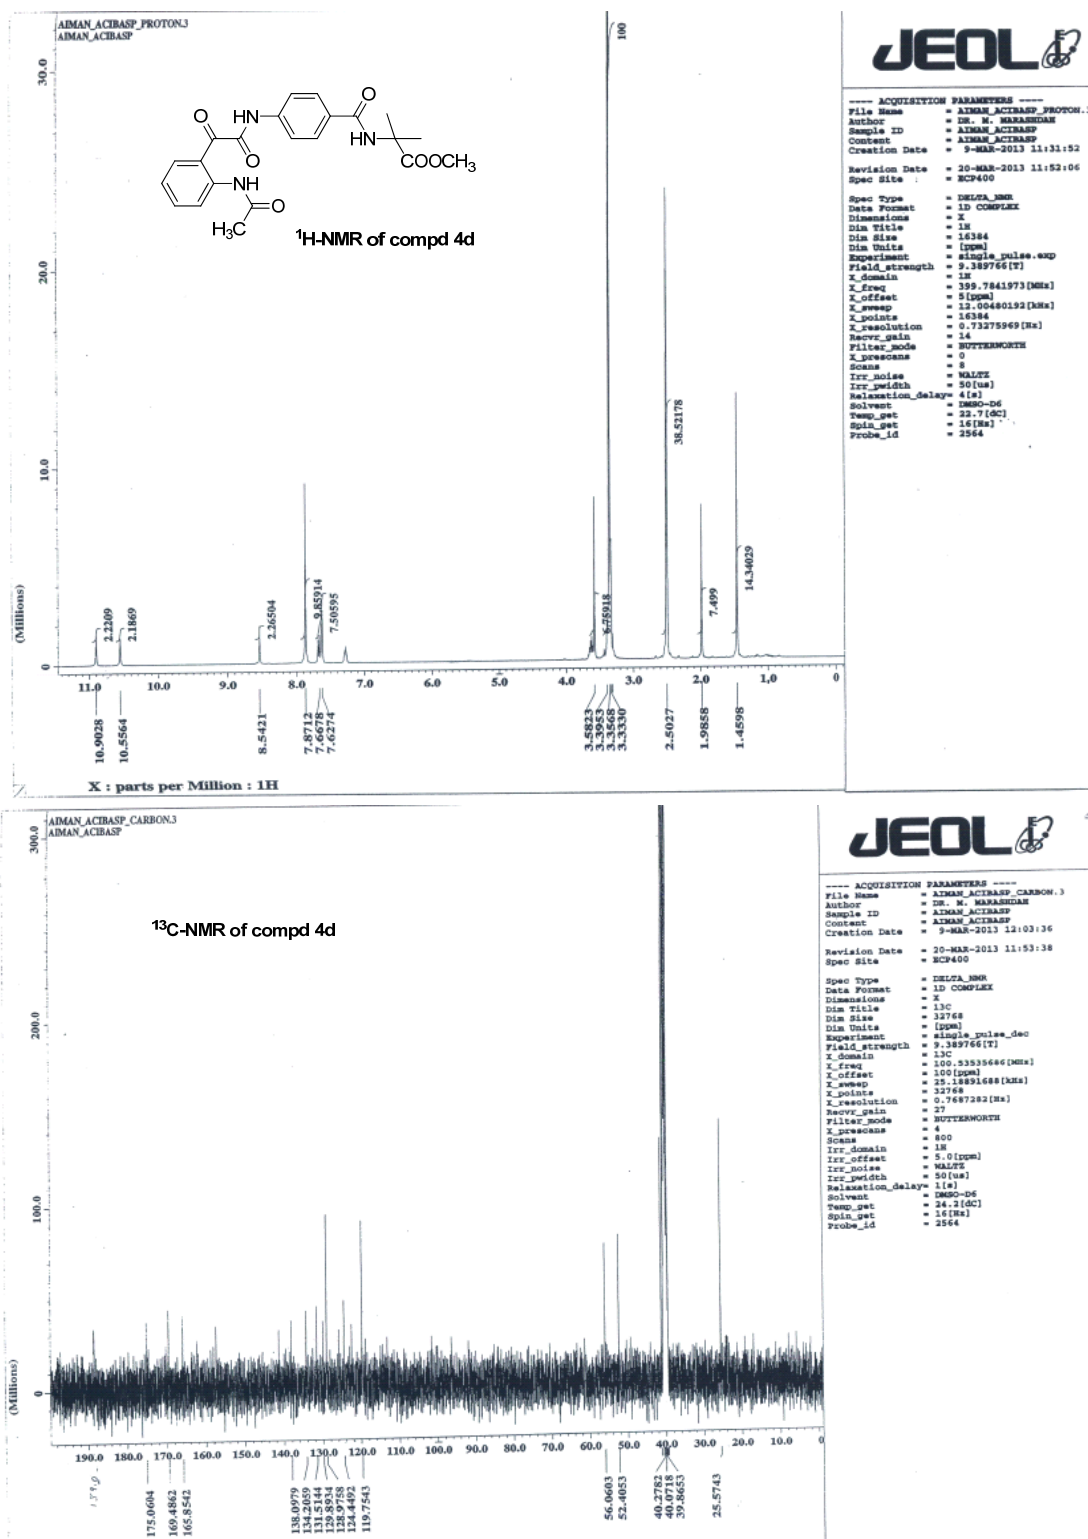

Figure S6. <sup>1</sup>H-NMR and <sup>13</sup>C-NMR of Compound 4e.

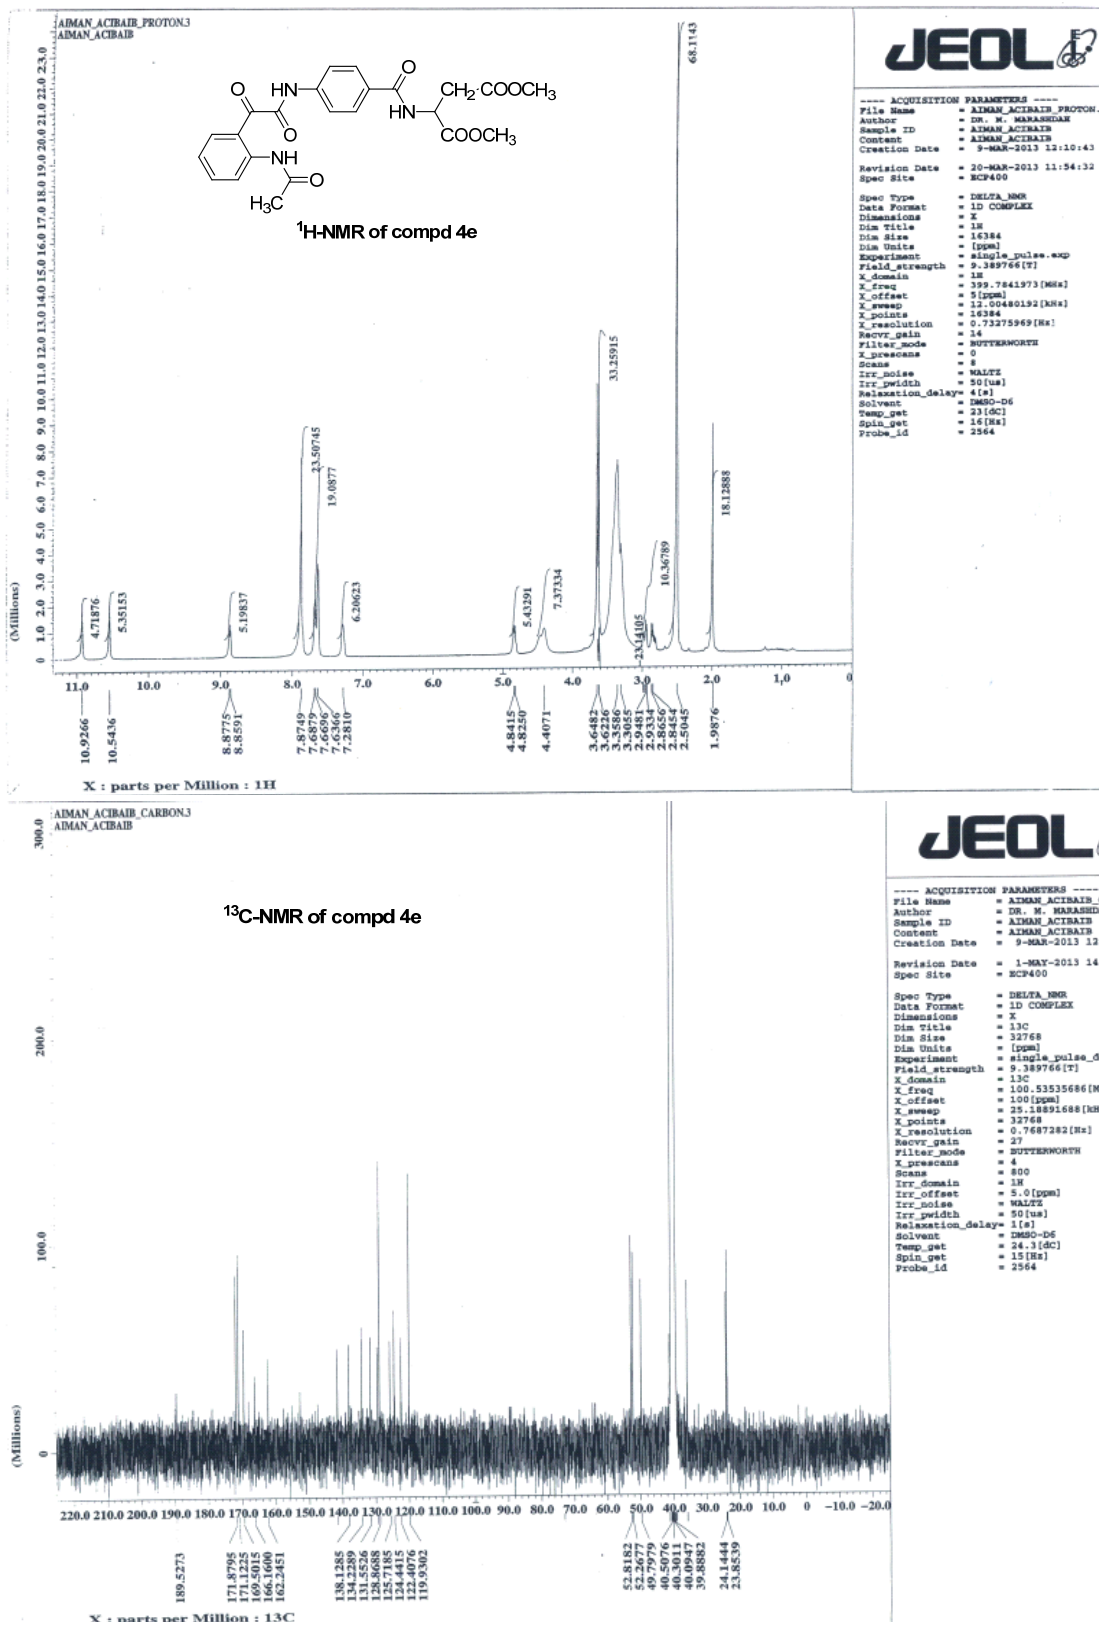

Figure S7.  $^1\text{H-NMR}$  and  $^{13}\text{C-NMR}$  of Compound 4f.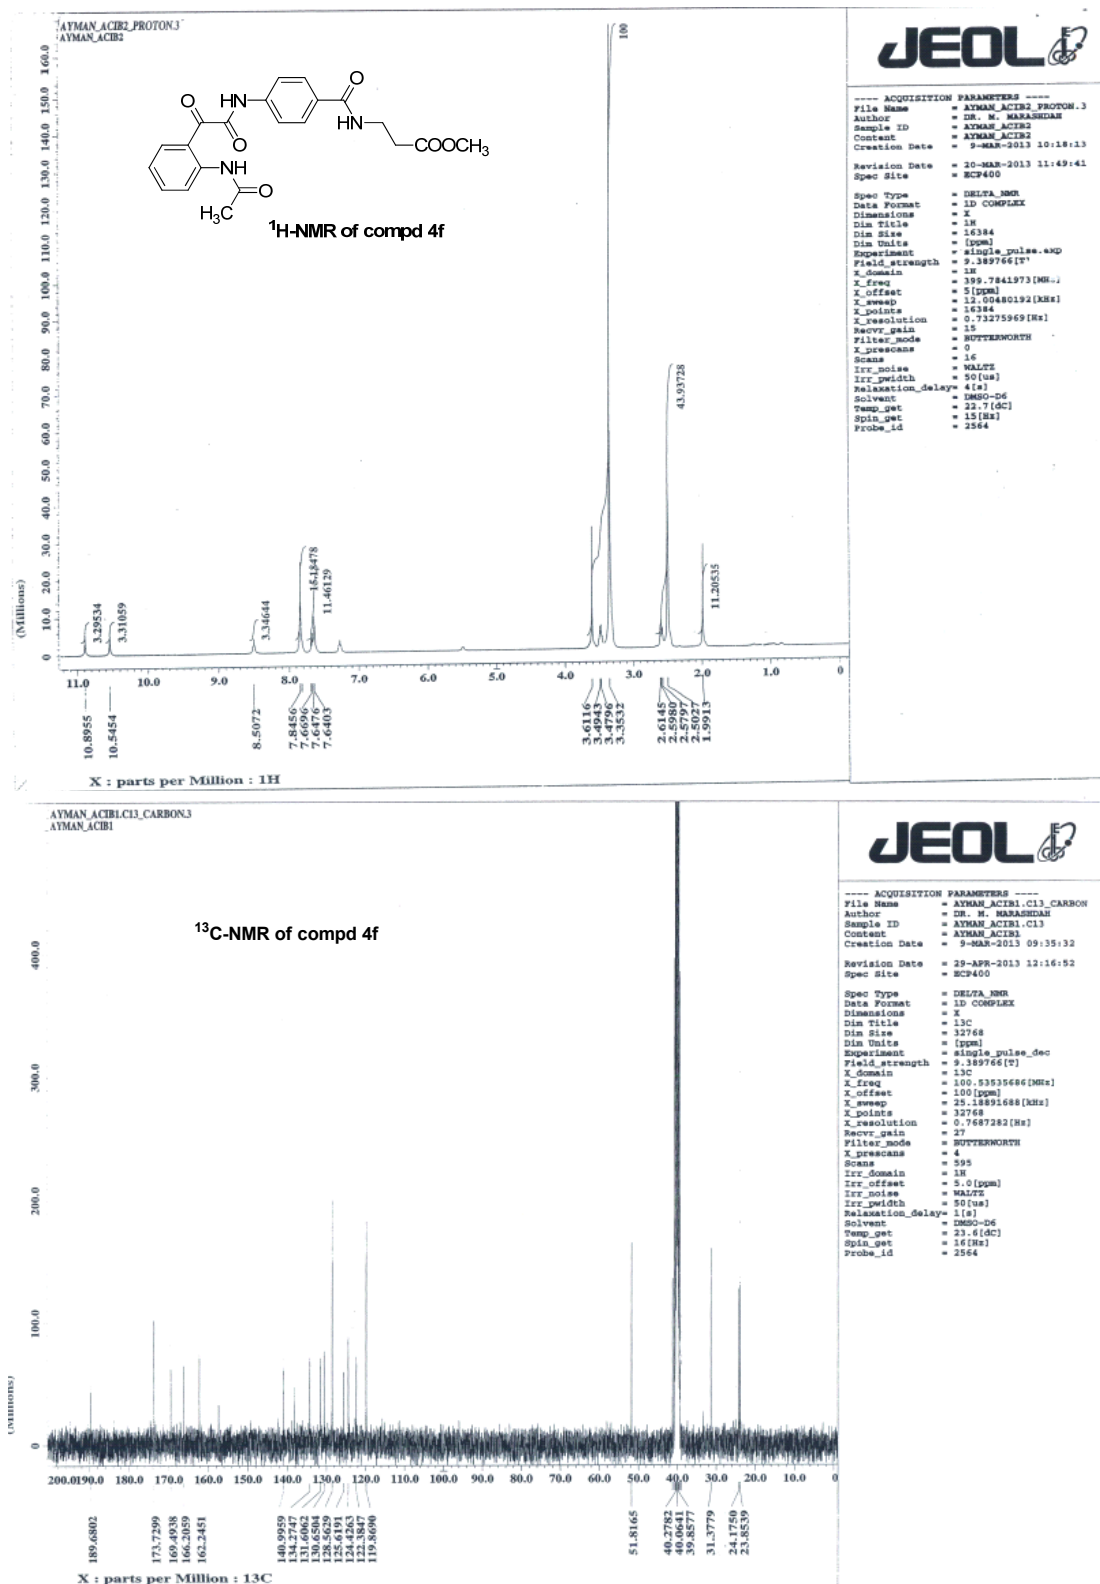

Figure S8. <sup>1</sup>H-NMR and <sup>13</sup>C-NMR of Compound 4g.

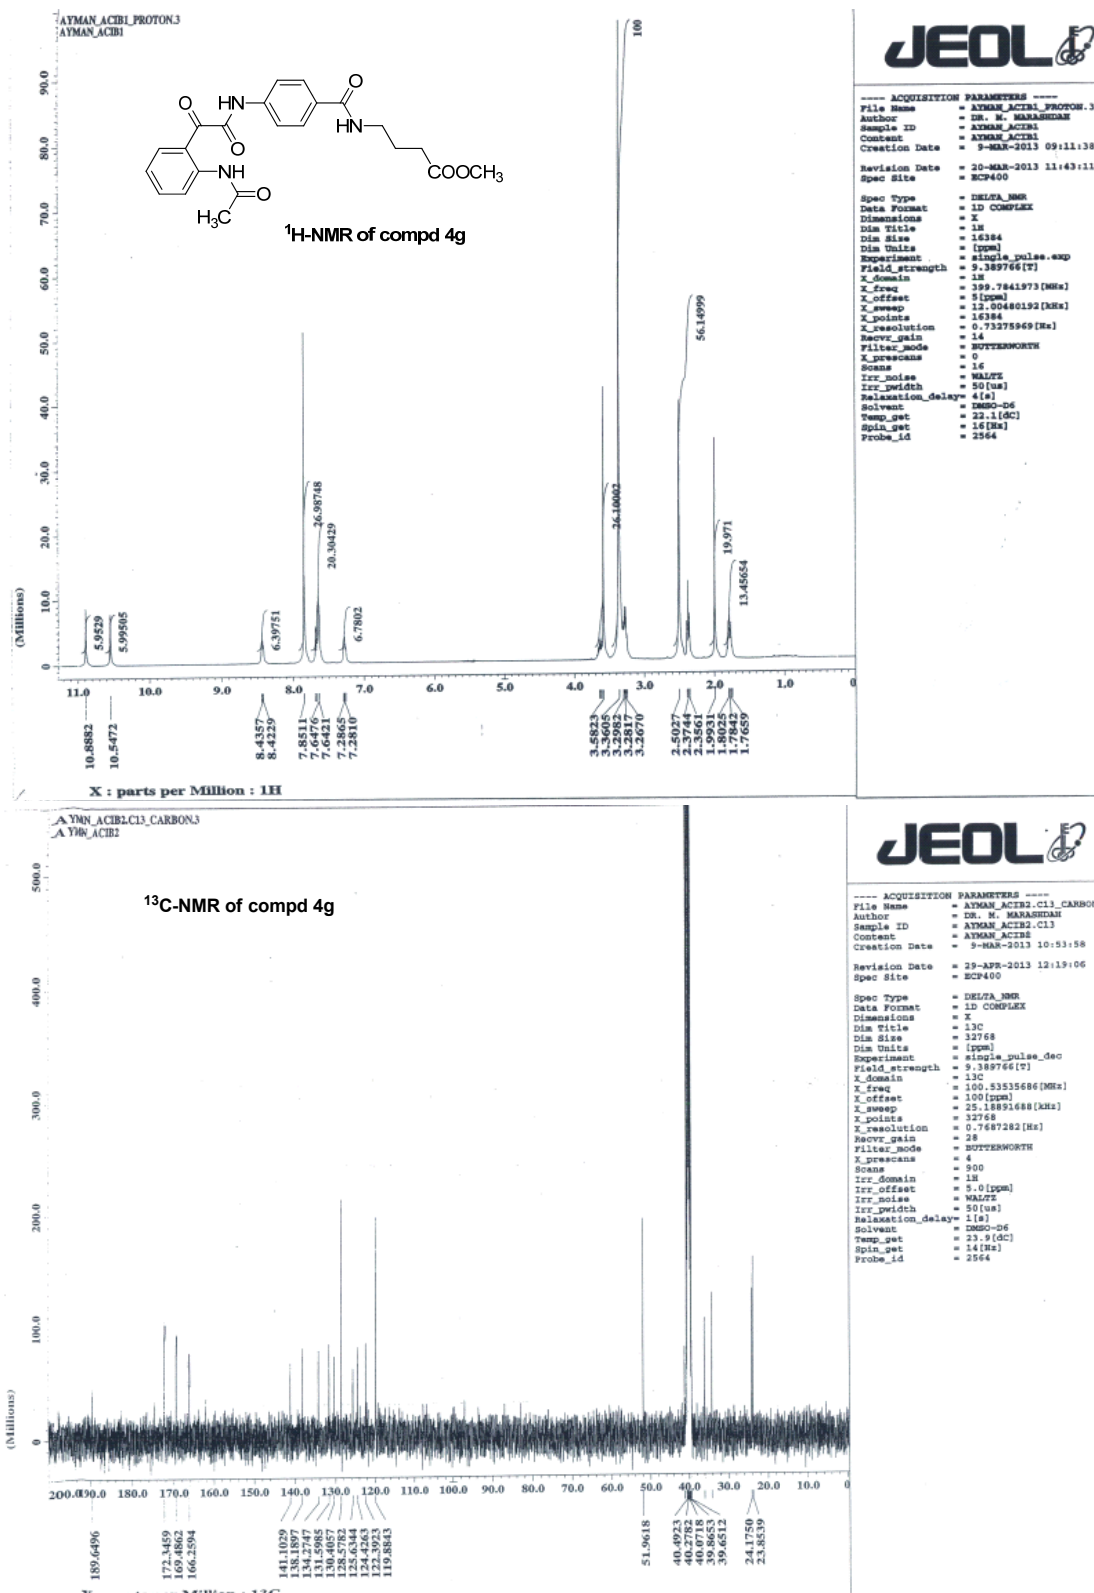



Figure S9. <sup>1</sup>H-NMR and <sup>13</sup>C-NMR of Compound 4h.

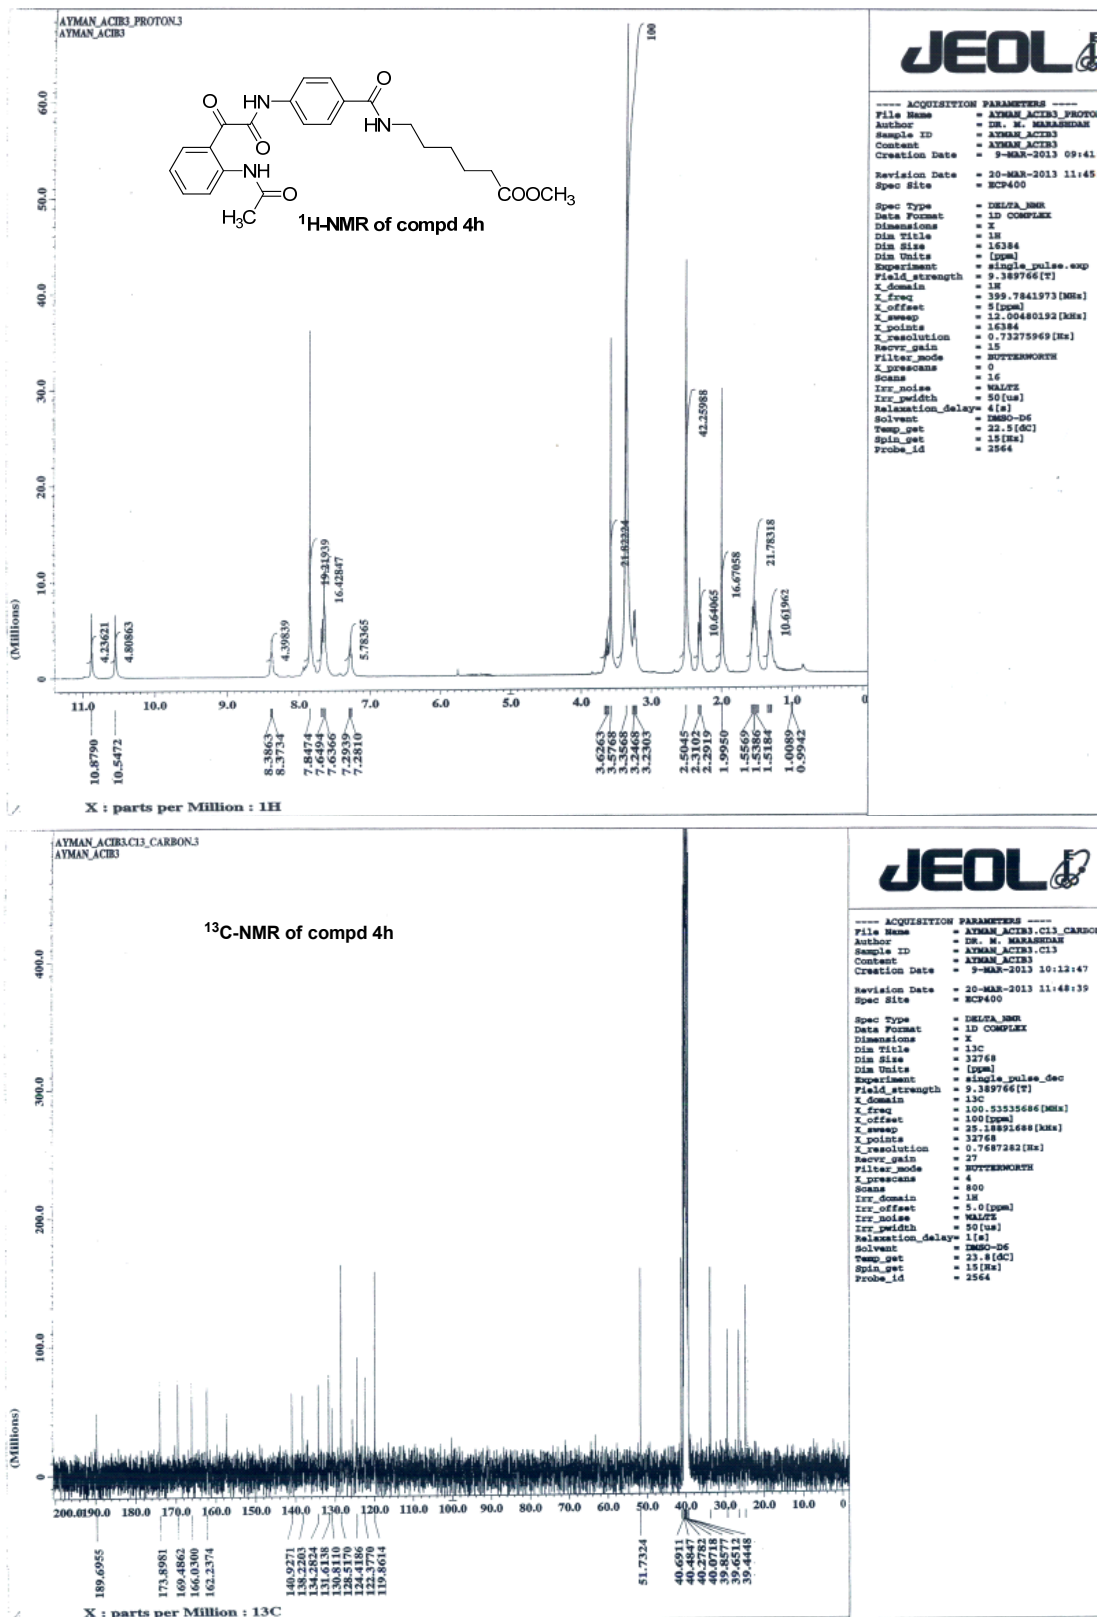

Figure S10. <sup>1</sup>H-NMR and <sup>13</sup>C-NMR of Compound 4i.

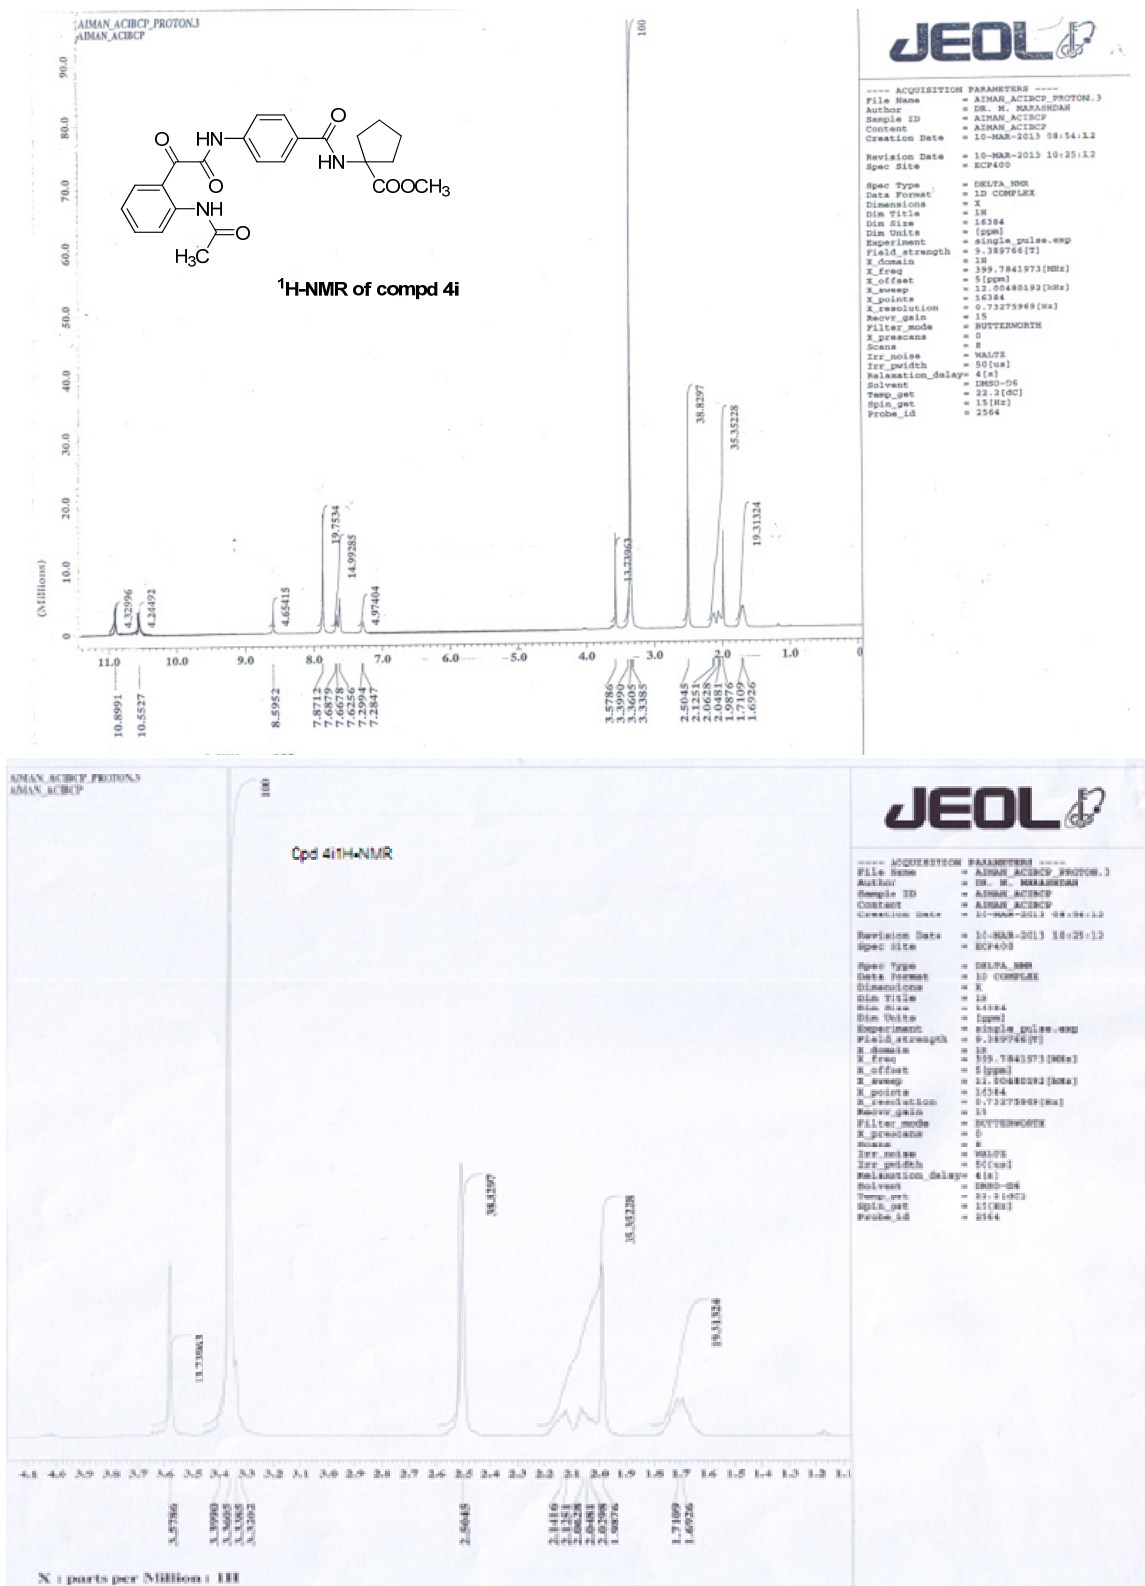

Figure 10. Cont.

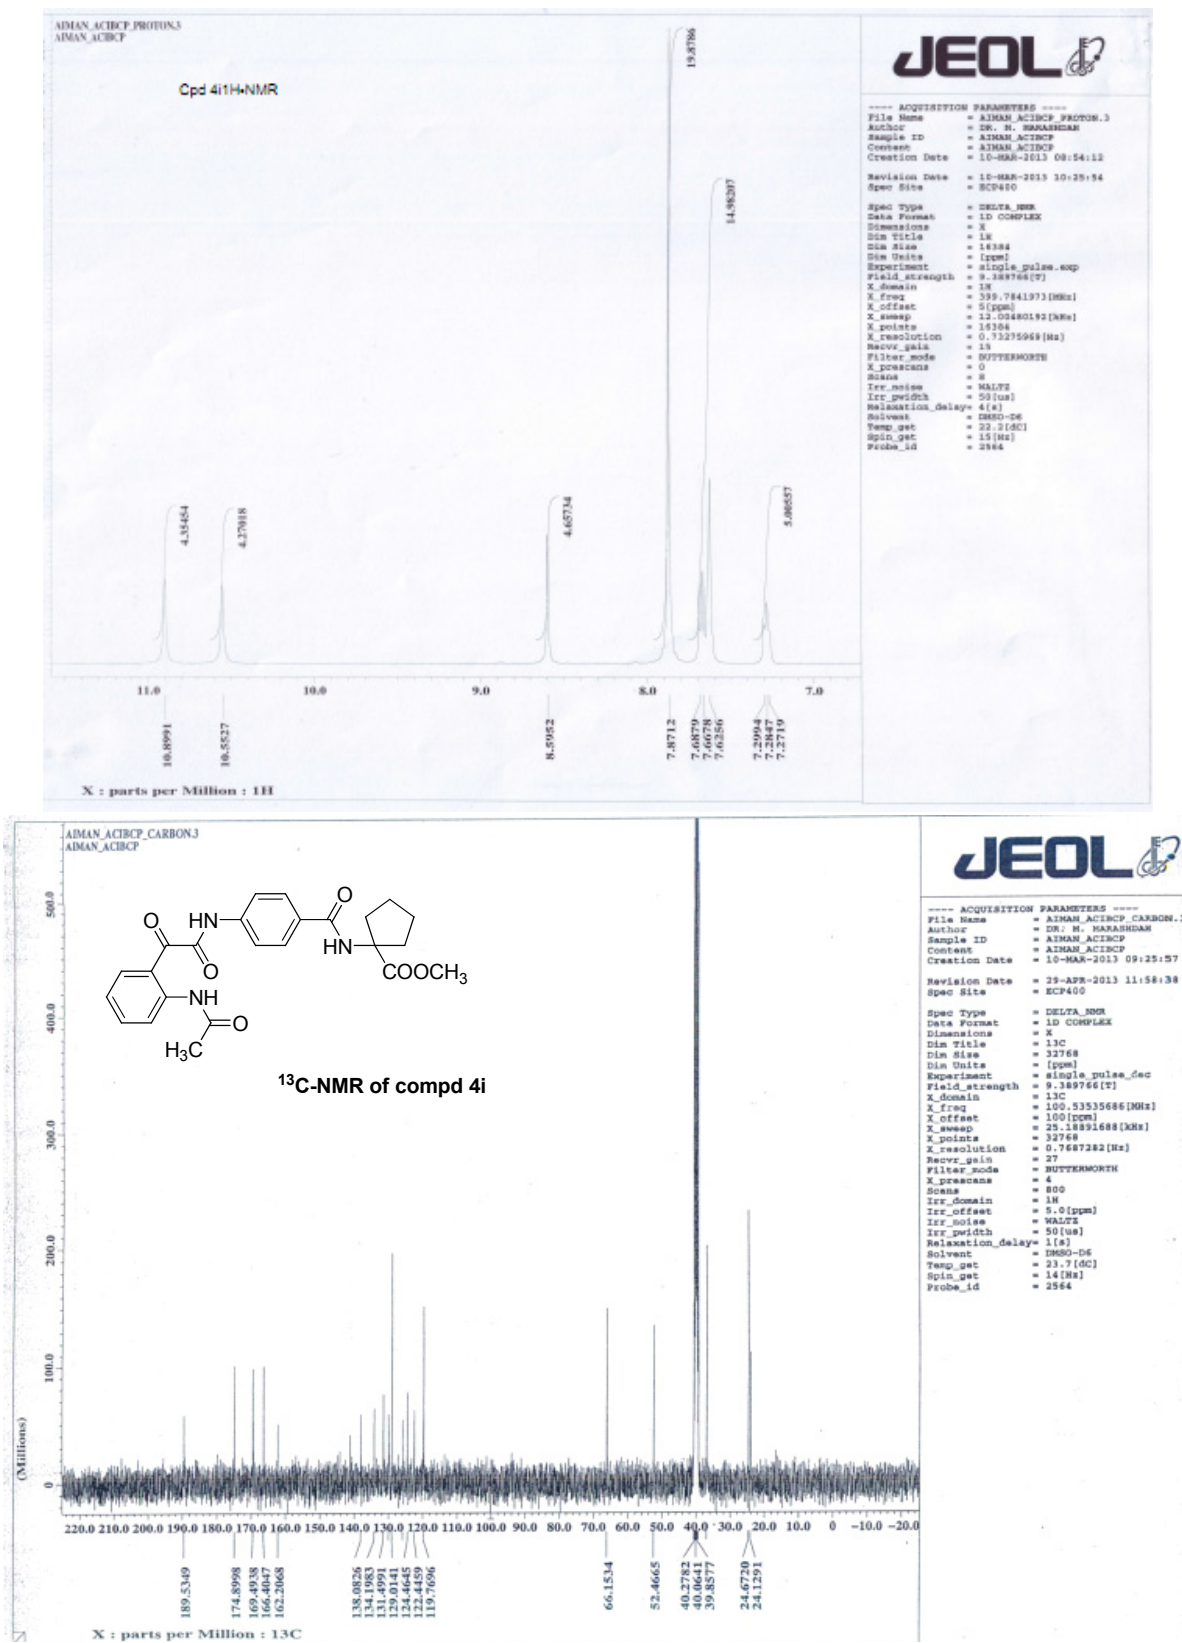

Supplement: molecules-18-14747-s001.pdf [file molecules-18-14747-s001.pdf]
